# Supplementary material
Source: HighWire-hosted journal article supplement (http://fn.bmj.com/highwire/filestream/160377/field_highwire_adjunct_files/0/fetalneonatal-2019-318627supp001_data_supplement.pdf)
Supplement: fetalneonatal-2019-318627supp001_data_supplement.pdf [file fetalneonatal-2019-318627supp001_data_supplement.pdf]

**E-Table 1: Description of the milking procedure**

| Study                       | Frequency of milking | Speed of milking    | Position of infant                                                                                                       | Length of umbilical cord squeezed | Time to clamp the cord in control group |
|-----------------------------|----------------------|---------------------|--------------------------------------------------------------------------------------------------------------------------|-----------------------------------|-----------------------------------------|
| <b>UCM Vs DCC</b>           |                      |                     |                                                                                                                          |                                   |                                         |
| Rabe 2011 <sup>1</sup>      | 4 times              | 10cm/sec            | Infant placed 20cm below level of placenta                                                                               | Whole length                      | 30 seconds                              |
| Katheria 2015 <sup>2</sup>  | 4 times              | Whole length /2 sec | Infant placed 20cm below level of placenta                                                                               | Whole length                      | 45 seconds                              |
| Shirk 2019 <sup>3</sup>     | 4 times              | 10cm/sec            | Infant held at the level of maternal abdomen in caesarean delivery or held at the level of perineum in vaginal delivery  | 20cm                              | 60 seconds                              |
| Finn 2019 <sup>4</sup>      | 3 times              | 10cm/sec            | Infant placed at or below the level of placenta                                                                          | 20cm                              | 60 seconds*                             |
| Katheria 2019 <sup>5</sup>  | 4 times              | 10cm/sec            | Infant held below the level of incision in caesarean delivery or held below the level of introitus in vaginal delivery   | 20cm                              | 60 seconds                              |
| <b>UCM Vs ICC</b>           |                      |                     |                                                                                                                          |                                   |                                         |
| Hosono 2008 <sup>6</sup>    | 2-3 times            | 20cm/2 sec          | Infant placed at the level or below the placenta                                                                         | 20cm                              | Immediately at birth                    |
| March 2013 <sup>7</sup>     | 3 times              | Not reported        | Infants placed at level of placenta in caesarean deliveries and at or below the level of placenta in vaginal deliveries. | 20 cm                             | Immediately at birth                    |
| Alan 2014 <sup>8</sup>      | 3 times              | 5 cm/sec            | Infants placed at level of placenta in caesarean deliveries and below the level of placenta in vaginal deliveries.       | 25-30 cm                          | <10 seconds                             |
| Josephsen 2014 <sup>9</sup> | 3 times              | Not specified       | Not specified                                                                                                            | 18cm                              | -                                       |
| Katheria 2014 <sup>10</sup> | 3 times              | 20cm/ 2 sec         | Infant held below the mother's introitus at vaginal delivery and below the level of the incision at caesarean delivery.  | 20 cm                             | Immediately at birth                    |
| Kumar 2015 <sup>11</sup>    | 3 times              | 10cm/s              | Infant placed under warmer, cord held upright and milked.                                                                | 25 cm                             | <30 seconds                             |
| Kilicdag 2016 <sup>12</sup> | 4 times              | 20cm/2 sec          | Infant placed at level of placenta                                                                                       | 20cm                              | Immediately at birth                    |
| Song 2017 <sup>13</sup>     | 4 times              | 20 cm/sec           | Infant was lowered to 20cm below the level of placenta                                                                   | Not specified                     | Immediately at birth                    |
| Alavi 2018 <sup>14</sup>    | 3 times              | 10 cm/sec           | Infant placed beside thigh (in CS) and at the level of uterus (in vaginal delivery)                                      | 25 cm                             | Immediately at birth                    |

|                                 |         |               |                                                                                                                           |                                                |                      |
|---------------------------------|---------|---------------|---------------------------------------------------------------------------------------------------------------------------|------------------------------------------------|----------------------|
| El-Naggar<br>2018 <sup>15</sup> | 3 times | 10 cm/sec     | Infant placed at the level or below the placenta.                                                                         | 20 cm (or if less,<br>the available<br>length) | <10 seconds          |
| Lago Leal<br>2018 <sup>16</sup> | 4 times | Not reported  | Not specified                                                                                                             | 20 cm                                          | <20 seconds          |
| Li 2018 <sup>17</sup>           | 4 times | 10 cm/sec     | Infant placed at the level or below the placenta.                                                                         | 20 cm                                          | Immediately at birth |
| RamMohan<br>2018 <sup>18</sup>  | 3 times | 10cm/sec      | Not specified                                                                                                             | 25 cm                                          | -                    |
| Silahli 2018 <sup>19</sup>      | 3 times | Not specified | Infant placed at or below the level of placenta if vaginal delivery or at the same level as placenta if caesarean section | 20 cm                                          | Within 10 seconds    |

Total duration of the milking procedure was reported in Song 2017 (15 to 20seconds), Katheria 2015 (25 seconds), Katheria 2019 (22.8 seconds with refill), Shirk 2019 (6 seconds for each milking maneuver to allow for cord refill).

Cord refill between milking maneuvers allowed in Shirk 2019, Katheria 2019, El-Naggar 2018, Katheria 2015 (2 seconds), Song 2017 (2 seconds).

\*Bed side resuscitation was done

**E- Table 2: Grade of evidence**

| OUTCOME                                         |              | ESTIMATE IN UCM GROUP | ESTIMATE IN CONTROL GROUP UP22/377 (5.8%) | RELATIVE EFFECT (95% CI) | NUMBER OF PARTICIPANTS | HETEROGENEITY | PRECISION | RISK OF BIAS           | QUALITY OF EVIDENCE |
|-------------------------------------------------|--------------|-----------------------|-------------------------------------------|--------------------------|------------------------|---------------|-----------|------------------------|---------------------|
| All-cause mortality                             | UCM Vs DCC   | 26/438 (5.9%)         | 29/452 (6.4%)                             | 0.93 (0.55,1.55)         | 890                    | 0%            | High      | Blinding in 2/4 RCTs * | Moderate            |
|                                                 | i-UCM Vs ICC | 22/347 (6.3%)         | 26/351 (7.4%)                             | 0.85 (0.49,1.46)         | 698                    | 27%           | High      | Blinding in 2/10 RCTs  | Moderate            |
|                                                 | c-UCM Vs ICC | 6/130 (4.6%)          | 6/130 (4.6%)                              | 1.00(0.35,2.90)          | 260                    | 34%           | Low       | Blinding in 0/2 RCTs   | Very Low            |
| Intraventricular hemorrhage (any grade)         | UCM Vs DCC   | 75/438 (17.1%)        | 83/452 (18.3%)                            | 0.93 (0.70,1.23)         | 890                    | 35%           | High      | Blinding in 2/4 RCTs   | Moderate            |
|                                                 | i-UCM Vs ICC | 61/347 (17.6%)        | 79/351 (22.5%)                            | 0.79 (0.60,1.06)         | 698                    | 0%            | High      | Blinding in 2/10 RCTs  | Moderate            |
|                                                 | cUCM Vs ICC  | 3/40 (7.5%)           | 7/40 (17.5%)                              | 0.43 (0.12-1.54)         | 80                     | NA            | Low       | Blinding in 0/1 RCT    | Very Low            |
| Intraventricular hemorrhage (grade 3 or more)   | UCM Vs DCC   | 24/356 (6.7%)         | 12/362 (3.3%)                             | 1.95 (1.01,3.76)         | 718                    | 0%            | High      | Blinding in 2/4 RCTs   | Moderate            |
|                                                 | i-UCM Vs ICC | 16/296 (5.4%)         | 24/302 (7.9%)                             | 0.69 (0.38,1.24)         | 598                    | 0%            | High      | Blinding in 2/8 RCTs   | Moderate            |
|                                                 | c-UCM Vs ICC | 0/30 (0%)             | 1/30 (3.3%)                               | 0.33 (0.01-7.87)         | 60                     | NA            | Low       | Blinding in 0/1 RCT    | Very Low            |
| Necrotizing enterocolitis (stage not specified) | UCM Vs DCC   | 11/145 (4.4%)         | 11/149 (5.1%)                             | 1.07 (0.50,2.30)         | 294                    | 0%            | Low       | Blinding in 1/3 RCTs   | Low                 |
|                                                 | i-UCM Vs ICC | 32/288 (11.1%)        | 41/289 (14.2%)                            | 0.83 (0.56,1.24)         | 577                    | 0%            | High      | Blinding in 2/8 RCTs   | Moderate            |

|                                              |              |                   |                   |                   |     |     |      |                      |          |
|----------------------------------------------|--------------|-------------------|-------------------|-------------------|-----|-----|------|----------------------|----------|
| Definite Necrotizing enterocolitis           | UCM Vs DCC   | 10/338<br>(2.9%)  | 17/348<br>(4.9%)  | 0.62 (0.29,1.31)  | 686 | 0%  | High | Blinding in 2/3 RCTs | Moderate |
|                                              | i-UCM Vs ICC | 18/117<br>(15.4%) | 22/123<br>(17.9%) | 0.91(0.55,1.52)   | 240 | 0%  | Low  | Blinding in 1/2 RCTs | Low      |
|                                              | c-UCM Vs ICC | 1/30<br>(3.3%)    | 2/30<br>(6.6%)    | 0.50(0.05-5.22)   | 60  | NA  | Low  | Blinding in 0/1 RCT  | Very Low |
| Patent ductus arteriosus requiring treatment | UCM Vs DCC   | 59/311<br>(19%)   | 71/317<br>(22.4%) | 0.85 (0.63,1.16)  | 628 | 0%  | High | Blinding in 2/2 RCTs | Moderate |
|                                              | i-UCM Vs ICC | 57/213<br>(24.3%) | 45/211<br>(20.7%) | 1.25 (0.90, 1.75) | 424 | 0%  | High | Blinding in 2/6 RCT  | Moderate |
|                                              | c-UCM Vs ICC | 2/30<br>(6.6%)    | 5/30<br>(16.6%)   | 0.40 (0.08-1.90)  | 60  | NA  | Low  | Blinding in 0/1 RCT  | Very Low |
| Retinopathy of prematurity (all stages)      | i-UCM Vs ICC | 34/88<br>(29.6%)  | 43/88<br>(37.3%)  | 0.83 (0.65,1.07)  | 176 | 46% | Low  | Blinding in 0/3 RCTs | Low      |
|                                              | c-UCM Vs ICC | 1/30<br>(3.3%)    | 1/30<br>(3.3%)    | 1.00(0.07-15.26)  | 60  | NA  | Low  | Blinding in 0/1 RCT  | Very Low |
| Retinopathy of prematurity needing treatment | UCM Vs DCC   | 11/329<br>(3.3%)  | 22/331<br>(6.6%)  | 0.51 (0.26,1.02)  | 660 | 0%  | High | Blinding in 2/3 RCTs | Moderate |
|                                              | i-UCM Vs ICC | 7/103<br>(6.8%)   | 13/97<br>(13.4%)  | 0.51 (0.21,1.21)  | 200 | 0%  | Low  | Blinding in 1/4 RCTs | Low      |
| Bronchopulmonary dysplasia                   | UCM Vs DCC   | 75/356<br>(21%)   | 68/362<br>(18.8%) | 1.09 (0.82,1.46)  | 718 | 0%  | High | Blinding in 2/4 RCTs | Moderate |
|                                              | i-UCM Vs ICC | 47/209<br>(22.5%) | 48/210<br>(22.8%) | 0.98 (0.69,1.39)  | 419 | 62% | High | Blinding in 2/6 RCTs | Moderate |
|                                              | c-UCM Vs ICC | 1/30<br>(3.3%)    | 1/30<br>(3.3%)    | 1.00 (0.07-15.26) | 60  | NA  | Low  | Blinding in 0/1 RCT  | Very Low |

|                                       |              |                    |                    |                     |     |     |      |                      |          |
|---------------------------------------|--------------|--------------------|--------------------|---------------------|-----|-----|------|----------------------|----------|
|                                       |              |                    |                    |                     |     |     |      |                      |          |
| Periventricular leukomalacia          | i-UCM Vs ICC | 2/123<br>(1.6%)    | 8/125<br>(6.4%)    | 0.30 (0.07,1.19)    | 248 | 0%  | Low  | Blinding in 1/3 RCTs | Low      |
|                                       | c-UCM Vs ICC | 1/30<br>(3.3%)     | 0/30<br>(0%)       | 3.00 (0.13-70.83)   | 60  | NA  | Low  | Blinding in 0/1 RCT  | Very Low |
| Duration of hospital stay (days)      | UCM Vs DCC   | 43.62              | 41.77              | 1.84 (-2.86,6.53)   | 736 | 54% | Low  | Blinding in 1/3 RCTs | Low      |
|                                       | i-UCM Vs ICC | 22.77              | 22.80              | -0.03 (-3.63,3.57)  | 396 | 0%  | High | Blinding in 2/5 RCTs | Low      |
| Need for blood transfusion            | UCM Vs DCC   | 156/456<br>(34.2%) | 175/466<br>(37.5%) | 0.91 (0.77,1.07)    | 922 | 18% | High | Blinding in 2/5 RCTs | Moderate |
|                                       | i-UCM Vs ICC | 41/117<br>(35%)    | 75/123<br>(60.9%)  | 0.56 (0.43,0.73)    | 240 | 73% | Low  | Blinding in 0/4 RCTs | Low      |
|                                       | c-UCM Vs ICC | 4/40<br>(10%)      | 32/40<br>(80%)     | 0.13 (0.05-0.32)    | 80  | NA  | Low  | Blinding in 0/1 RCT  | Very Low |
| Need for blood transfusion in 28 days | i-UCM Vs ICC | 34/105<br>(32.4%)  | 43/108<br>(39.8%)  | 0.85 (0.69,1.04)    | 213 | 0%  | Low  | Blinding in 1/2 RCTs | Low      |
|                                       | c-UCM Vs ICC | 3/30<br>(10%)      | 6/30<br>(20%)      | 0.50 (0.14-1.82)    | 60  | NA  | Low  | Blinding in 0/1 RCT  | Very Low |
| Number of blood transfusion           | UCM Vs DCC   | 2.73               | 2.41               | 0.32 (-0.23,0.87)   | 564 | 0%  | High | Blinding in 1/3 RCTs | Moderate |
|                                       | i-UCM Vs ICC | 1.04               | 1.05               | -0.01 (-0.15, 0.13) | 182 | 28% | Low  | Blinding in 1/4 RCTs | Low      |
| Need for phototherapy                 | UCM Vs DCC   | 315/354<br>(89%)   | 321/356<br>(90.2%) | 0.99 (0.94,1.04)    | 710 | 0%  | High | Blinding in 1/3 RCTs | Moderate |
|                                       | i-UCM Vs ICC | 144/190<br>(75.8%) | 129/198<br>(65.1%) | 1.17 (1.04,1.31)    | 388 | 85% | Low  | Blinding in 2/4 RCTs | Low      |
|                                       | c-UCM Vs ICC | 72/140             | 18/140             | 4.00 (2.57-6.24)    | 280 | 0%  | Low  | Blinding in 0/2 RCTs | Very Low |

|  |  |       |       |  |  |  |  |  |  |
|--|--|-------|-------|--|--|--|--|--|--|
|  |  | (51%) | (13%) |  |  |  |  |  |  |
|--|--|-------|-------|--|--|--|--|--|--|

\*Blinding

of

clinicians

to

the

intervention

**E-Table 3: Sensitivity analysis**

| Item                                                                                | UCM vs DCC<br>RR(95% CI) FEM                                | UCM vs ICC<br>RR(95% CI) FEM                                  |
|-------------------------------------------------------------------------------------|-------------------------------------------------------------|---------------------------------------------------------------|
| Studies with low ROB on allocation concealment<br>All-cause mortality<br>Severe IVH | 0.93(0.55,1.55) – 4 studies<br>1.95 (1.01,3.76) – 4 studies | 1.39 (0.70,2.77) – 7 studies<br>0.80 (0.43-1.51) -- 6 studies |
| Mean gestational age <32 weeks<br>All-cause mortality<br>Severe IVH                 | 0.87 (0.49-1.52) - 4 studies<br>1.95(1.01-3.76) - 4studies  | 0.90 (0.50-1.60) - 8 studies<br>0.73 (0.40-1.35) - 6 studies  |

**E-Table 4: Neonatal outcomes (cut UCM Vs ICC)**

RCTs: Comparison of umbilical cord milking vs immediate cord clamping in preterm infants

| Outcome                                         | No: of studies | No: of participants | RR or MD (95% CI) | P value | I <sup>2</sup> value,% |
|-------------------------------------------------|----------------|---------------------|-------------------|---------|------------------------|
| All cause mortality                             | 2              | 260                 | 1.00(0.35,2.90)   | 1.00    | 34%                    |
| Intraventricular hemorrhage(all grades)         | 1              | 80                  | 0.43 (0.12,1.54)  | 0.19    | NA                     |
| Intraventricular hemorrhage (grade III or more) | 1              | 60                  | 0.33 (0.01,7.87)  | 0.50    | NA                     |
| Necrotizing enterocolitis (stage 2 or more)     | 1              | 60                  | 0.50 (0.05,5.22)  | 0.56    | 0%                     |
| Patent ductus arteriosus needing treatment      | 1              | 60                  | 0.40(0.08-1.90)   | 0.25    | NA                     |
| Retinopathy of prematurity (all stages)         | 1              | 60                  | 1.00 (0.07,15.26) | 1.00    | NA                     |
| Bronchopulmonary dysplasia                      | 1              | 60                  | 1.00 (0.07,15.26) | 1.00    | 54%                    |
| Periventricular leucomalacia                    | 1              | 60                  | 3.00 (0.13,70.83) | 0.50    | NA                     |
| Need for packed red blood cell transfusion      | 1              | 80                  | 0.13 (0.05, 0.32) | <0.001  | NA                     |
| Need for pRBC transfusion in 28 days            | 1              | 60                  | 0.50(0.14,1.82)   | 0.29    | NA                     |
| Need for phototherapy                           | 2              | 280                 | 4.00(2.57,6.24)   | <0.001  | 0%                     |

**E-Table 5: Ongoing clinical trials**

| Serial no:        | Study id                           | Study design    | Inclusion criteria                              | Intervention vs control<br>Sample size | Institution, country                                      | Primary outcome                                          |
|-------------------|------------------------------------|-----------------|-------------------------------------------------|----------------------------------------|-----------------------------------------------------------|----------------------------------------------------------|
| <b>UCM Vs ICC</b> |                                    |                 |                                                 |                                        |                                                           |                                                          |
| 1                 | NCT03731611 <sup>20</sup>          | Pilot RCT       | Preterm < 34 weeks with placental insufficiency | Intact UCM vs ICC<br>N=90              | Mansoura University Children Hospital, Egypt              | Peripheral venous CD34 at admission                      |
| 2                 | NCT03200301 <sup>21</sup>          | RCT             | Preterm <32 weeks                               | Intact UCM vs ICC<br>N=250             | Jubilee Mission Medical College, Thrissur, India          | Hemoglobin levels at birth and IVH in first week of life |
| 3                 | NCT03023917 <sup>22</sup>          | Multicentre RCT | Preterm <34 weeks                               | Intact UCM vs ICC<br>N=300             | Shanghai Jiao Tong university School of Medicine, China   | Hemoglobin, hematocrit, ferritin at birth                |
| 4                 | NCT01666847 <sup>23</sup>          | RCT             | Preterm 24-27 <sup>6/7</sup> weeks              | Intact UCM vs ICC<br>N=59              | Saint Louis University, Missoure, United States           | Hemoglobin and hematocrit at birth                       |
| 5                 | NCT02043249 <sup>24</sup>          | RCT             | Preterm <37 weeks                               | UCM vs ICC<br>N=200                    | Hillel Yaffe Medical centre, Israel                       | IgG levels in infants at delivery                        |
| 6.                | NCT01819532 <sup>26</sup>          | RCT             | Preterm <33 weeks                               | Intact UCM vs ICC<br>N=22              | John Hopkins Hospital, Baltimore, Maryland, United States | Hemoglobin within 24 hours of life                       |
| 7.                | CTRI/2017/08/009484 <sup>27</sup>  | RCT             | Neonates > 28weeks                              | Intact UCM Vs ICC<br>N=236             | King George Medical University, Lucknow, India            | Hemoglobin and haematocrit at birth and 6 weeks.         |
| 8                 | IRCT20180201038586N1 <sup>28</sup> | RCT             | Preterm 28 - 34 weeks                           | Intact UCM vs ICC<br>N=160             | Mashhad University of Medical Sciences, Iran              | Amount of blood transfused, amount of bilirubin          |
| <b>UCM Vs DCC</b> |                                    |                 |                                                 |                                        |                                                           |                                                          |
| 1                 | NCT02996799 <sup>25</sup>          | RCT             | Preterm <32 weeks                               | Intact UCM vs ICC<br>N=180             | King AbdulAziz University, Jeddah, Saudi Arabia           | IVH within 28 days of life                               |
| 2                 | NCT02187510 <sup>29</sup>          | RCT             | Preterm born by LSCS <34 weeks                  | Intact UCM vs DCC<br>N=40              | Corporacio Parc Tauli, Barcelona, Spain                   | Hb at birth                                              |
| 3                 | TCTR20150106001 <sup>30</sup>      | RCT             | Preterm <34 weeks                               | Intact UCM vs DCC<br>N=46              | Phramongkutkiao hospital, Bangkok                         | Hematocrit within 2 hours of birth                       |
| 4                 | NCT03147846 <sup>31</sup>          | RCT             | Preterm 24-35 weeks                             | Intact UCM vs DCC (45-                 | Zagazig University, Saudi                                 | HCT at birth                                             |



|   |                                |     |                   |                            |                                                               |                                                 |
|---|--------------------------------|-----|-------------------|----------------------------|---------------------------------------------------------------|-------------------------------------------------|
|   |                                |     |                   | 60sec)<br>N=200            | Arabia                                                        |                                                 |
| 5 | NCT02092103 <sup>32</sup>      | RCT | Preterm <34 weeks | Intact UCM vs DCC<br>N=282 | Good Samaritan Tri<br>Health Hospital, Ohio,<br>United States | Hb and HCT at birth                             |
| 6 | ChiCTR1800018366 <sup>33</sup> | RCT | Preterm neonates  | UCM Vs DCC<br>N=48         | Suining Central<br>Hospital, Sichuan, China                   | Cerebral hemodynamics<br>15 minutes after birth |

**Search criteria:**

The databases were searched using the following keywords and medical subject headings for a) Population: ‘Infant, Newborn’ OR ‘Infant, Premature’ OR ‘Infant, Low Birth Weight’ OR ‘Infant, Extremely Low Birth Weight’ OR ‘Infant, Very Low Birth Weight’ OR ‘Infant, Small for Gestational Age’ AND b) Intervention: ‘Umbilical cord’ OR ‘Umbilical cord milking’ OR ‘Placental transfusion’ AND c) Randomized Controlled Trial or controlled clinical trial or clinical trial (publication type). No language restrictions were placed. Animal studies were excluded.

**E-Figure 1: Neonatal outcomes (UCM Vs DCC)**

**NEC (stage not reported)**

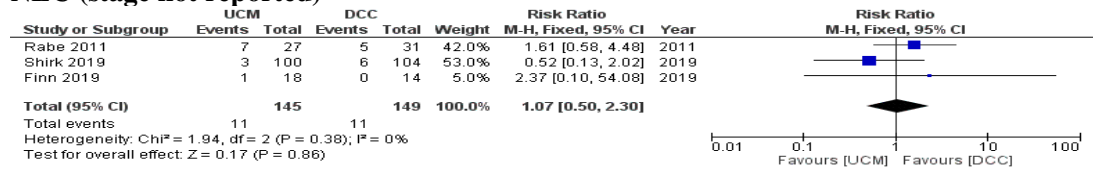

**Need for phototherapy**

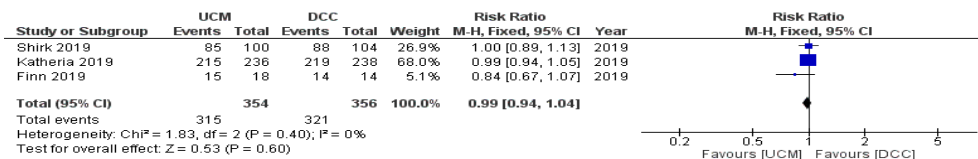

**Duration of hospital stay**

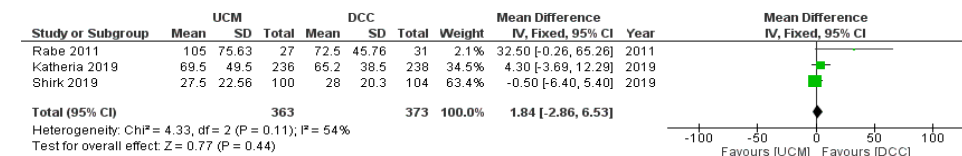

**BPD**

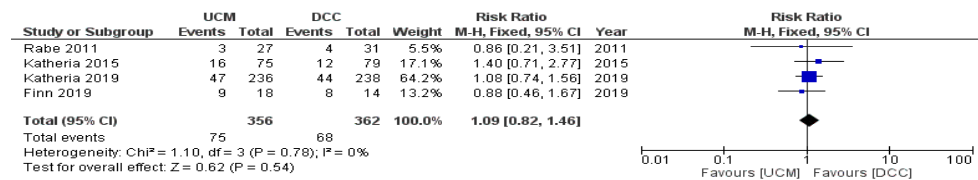

**PDA**

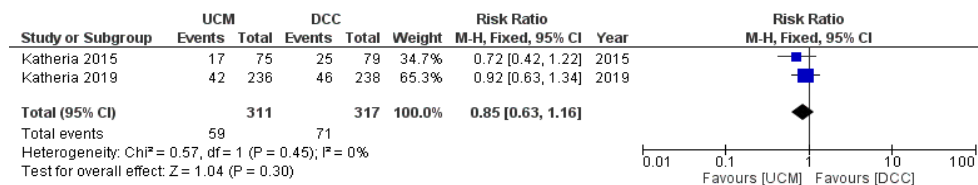

**Number of RBC transfusions**

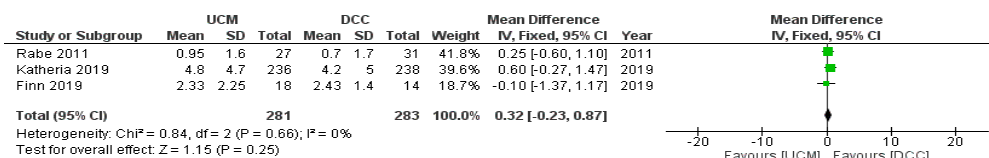

**E- Figure 2: Neonatal outcomes (i-UCM Vs ICC)**

**PDA requiring treatment**

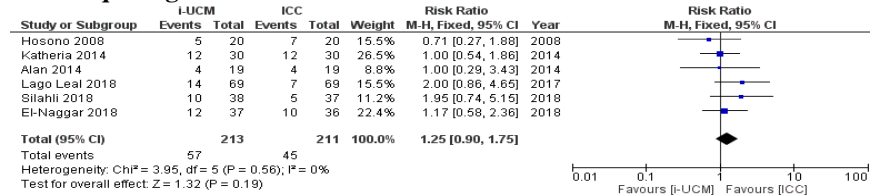

**Definite NEC**

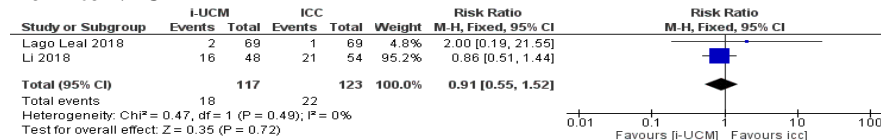

**Bronchopulmonary dysplasia**

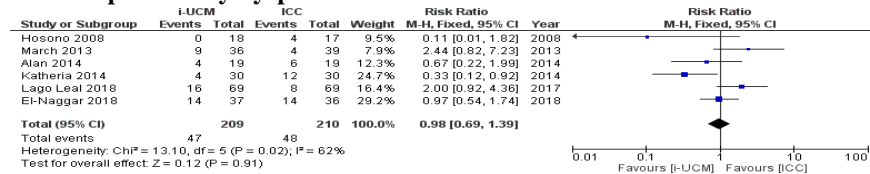

**ROP (all stages)**

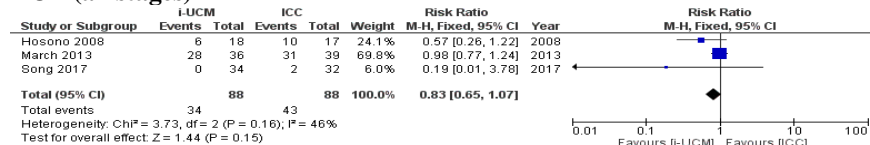

**PVL**

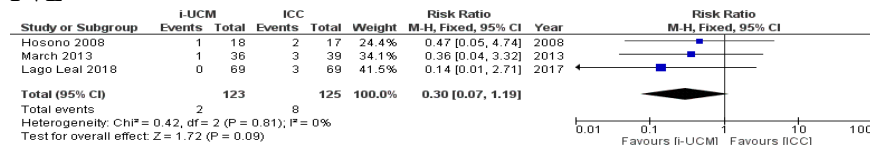

**Number of packed RBC transfusions**

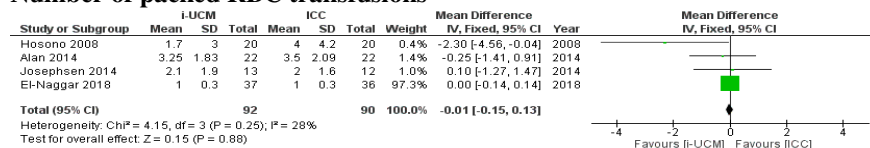

**Need for phototherapy**

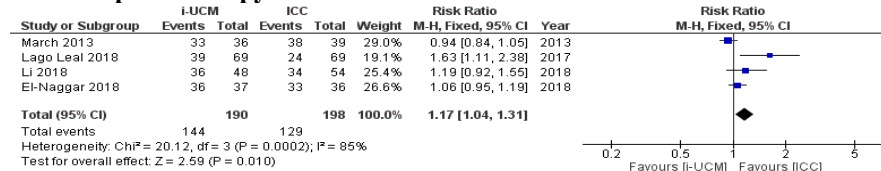

**Duration of hospital stay**

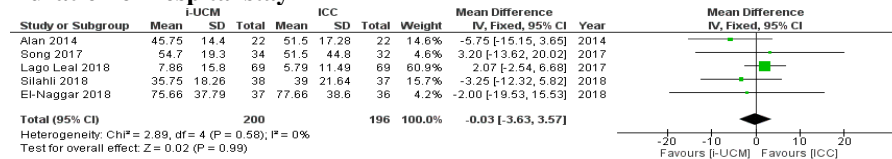

**E Figure 3: Long term neurodevelopmental outcomes (UCM Vs DCC)****Bayley III cognitive score**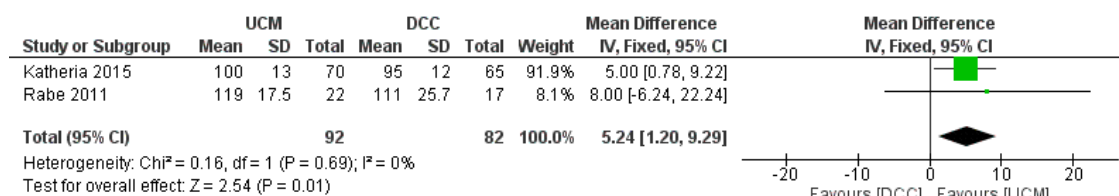**Bayley III Language score**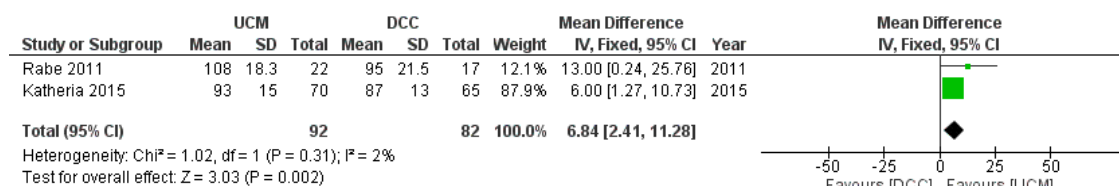**Bayley III Motor score**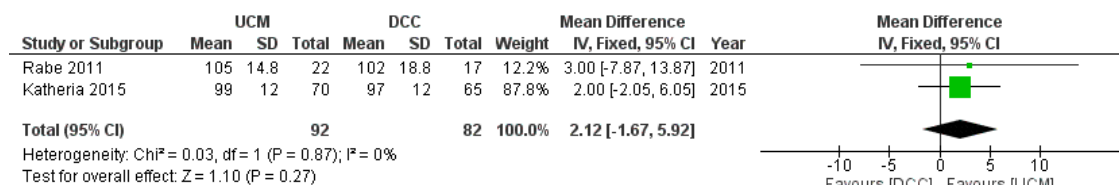

**References;**

1. Rabe H, Jewison A, Alvarez RF, *et al.* Milking compared with delayed cord clamping to increase placental transfusion in preterm neonates: A randomized controlled trial. *Obstet Gynecol* 2011;117:205-11.
2. Katheria AC, Truong G, Cousins L, Oshiro B, Finer NN. Umbilical cord milking versus delayed cord clamping in preterm infants. *Pediatrics* 2015;136:61-9.
3. Shirk SK, Manolis SA, Lambers DS, Smith KL. Delayed clamping vs milking of umbilical cord in preterm infants: A randomized controlled trial. *Am J Obstet Gynecol* 2019;220:482.e481-482.e488.
4. Finn D, Ryan DH, Pavel A, *et al.* Clamping the umbilical cord in premature deliveries (cupid): Neuromonitoring in the immediate newborn period in a randomized, controlled trial of preterm infants born at <32 weeks of gestation. *J Pediatr.* 2019; 208:121- 6.e122.
5. Katheria A, Reister F, Essers J, *et al.* Association of umbilical cord milking vs delayed umbilical cord clamping with death or severe intraventricular hemorrhage among preterm infants. *JAMA* 2019;322:1877-86.
6. Hosono S, Mugishima H, Fujita H, *et al.* Umbilical cord milking reduces the need for red cell transfusions and improves neonatal adaptation in infants born at less than 29 weeks' gestation: A randomised controlled trial. *Arch Dis Child Fetal Neonatal Ed* 2008;93:F14-19.
7. March MI, Hacker MR, Parson AW, Modest AM, de Veciana M. The effects of umbilical cord milking in extremely preterm infants: A randomized controlled trial. *J Perinatol* 2013;33:763-767.
8. Alan S, Arsan S, Okulu E, *et al.* Effects of umbilical cord milking on the need for packed red blood cell transfusions and early neonatal hemodynamic adaptation in preterm infants born  $\leq 1500$  g: A prospective, randomized, controlled trial. *J Pediatr Hematol Oncol* 2014;36:e493-498.
9. Josephsen J, Vlastos E, Potter S, Al-Hosni M. Milking the umbilical cord in extreme preterm infants. Paper presented at: 34th Annual Meeting of the Society for Maternal-Fetal Medicine (The Pregnancy Meeting); 3-8 February 2014, 2014; New Orleans, LA.
10. Katheria AC, Leone TA, Woelkers D, Garey DM, Rich W, Finer NN. The effects of umbilical cord milking on hemodynamics and neonatal outcomes in premature neonates. *J Pediatr* 2014;164:1045-50.e1041.
11. Kumar B, Upadhyay A, Gothwal S, Jaiswal V, Joshi P, Dubey K. Umbilical cord milking and hematological parameters in moderate to late preterm neonates: A randomized controlled trial. *Indian Pediatr* 2015;52:753-7.
12. Kilicdag H, Gulcan H, Hanta D, *et al.* Is umbilical cord milking always an advantage? *J Matern Fetal Neonatal Med* 2016;29:615-8.
13. Song SY, Kim Y, Kang BH, Yoo HJ, Lee M. Safety of umbilical cord milking in very preterm neonates: A randomized controlled study. *Obstet Gynecol Sci.* 2017; 60:527-34.
14. Alavi A, Diuband A, Etaati Z, Boushehri Z, Heidari P. Investigating the effect of umbilical cord milking on neonatal outcomes among the preterm infants born in shariati hospital of bandar abbas. *Journal of Research in Medical and Dental Science* 2018; 6:133-9.
15. El-Naggar W, Simpson D, Hussain A, *et al.* Cord milking versus immediate clamping in preterm infants: A randomised controlled trial. *Arch Dis Child Fetal Neonatal Ed* 2018;104:F145-F150

16. Lago Leal V, Pamplona Bueno L, Cabanillas Vilaplana L, *et al.* Effect of milking maneuver in preterm infants: A randomized controlled trial. *Fetal Diagn Ther.* 2019;45:57-61
17. Li J, Yu B, Wang W, Luo D, Dai QL, Gan XQ. Does intact umbilical cord milking increase infection rates in preterm infants with premature prolonged rupture of membranes? *J Matern Fetal Neonatal Med* 2018;1-7.
18. Ram Mohan G, Shashidhar A, Chandrakala BS, Nesargi S, Suman Rao PN. Umbilical cord milking in preterm neonates requiring resuscitation: A randomized controlled trial. *Resuscitation* 2018;130:88-91.
19. Silahli M, Duman E, Gokmen Z, Toprak E, Gokdemir M, Ecevit A. The relationship between placental transfusion, and thymic size and neonatal morbidities in premature infants - a randomized control trial. *J Pak Med Assoc* 2018;68:1560-5.
20. Impact of umbilical cord milking in preterm neonates with placental insufficiency. NLM identifier NCT03731611. <http://clinicaltrials.gov/ct2/show/nct03731611>. Accessed Nov 30,2019.
21. Effect of intact umbilical cord milking on neonatal and first year neurodevelopmental outcomes in very preterm infants. (cord milking).NLM identifier NCT03200301. <http://clinicaltrials.gov/ct2/show/nct03200301>. Accessed Nov 30,2019.
22. The study on umbilical cord milking to prevent and decrease the severity of anemia in preterms. NLM identifier NCT03023917. <http://clinicaltrials.gov/ct2/show/nct03023917>. Accessed. Nov 30,2019.
23. Milking the umbilical cord for extreme preterm infants. NLM identifier NCT 01666847. <http://clinicaltrials.gov/ct2/show/nct01666847>. Accessed Nov 30,2019.
24. Cord milking and activity of the immune system in preterm infants. NLM identifier NCT02043249. <http://clinicaltrials.gov/ct2/show/nct02043249>. Accessed Nov 30, 2019.
25. Deferred cord clamping compared to umbilical cord milking in preterm infants. NLM identifier NCT02996799. <http://clinicaltrials.gov/ct2/show/nct02996799>. Accessed Nov 30,2019.
26. Milking the umbilical cord versus immediate clamping in pre-term infants < 33 weeks. NLM identifier NCT01819532. <http://clinicaltrials.gov/ct2/show/nct01819532>. Accessed Nov 30,2019.
27. The effects of umbilical cord squeezing in newborn babies requiring some form of intervention to help and support breathing at birth. CTRI/2017/08/009484. [http://www.Ctri.Nic.In/clinicaltrials/pdf\\_generate.Php?Trialid=18641&enchid=&modid=&compid=%27,%2718641det%27](http://www.Ctri.Nic.In/clinicaltrials/pdf_generate.Php?Trialid=18641&enchid=&modid=&compid=%27,%2718641det%27). Accessed Nov 30,2019.
28. Investigation and comparison of neonatal complications of two methods of umbilical cord milking and early cord clamping in neonates. IRCT20180201038586N1 . <http://en.Irct.Ir/trial/29424>. Accessed Nov 30,2019.
29. Umbilical cord milking vs delayed cord clamping in preterm infants born by cesarean section. NLM identifier NCT02187510. <http://clinicaltrials.gov/ct2/show/nct02187510>. Accessed Nov 30,2019.
30. Effect of delayed cord clamping versus cord milking in infants born at < 34 weeks gestation: A randomized controlled trial. TCTR20150106001. <http://wwwclinicaltrialsint/index.php?Tp=regtrials&menu=trialssearch&smenu=fulltext&task=search&task2=view1&id=1277>. Accessed Nov 30,2019.
31. The hematological impact of umbilical cord milking versus deferred cord clamping in premature neonates. NLM identifier NCT03147846. <http://clinicaltrials.gov/ct2/show/nct03147846>. Accessed Nov 30,2019.

32. Delayed clamping and milking the umbilical cord in preterm infants. NLM identifier NCT02092103. <http://clinicaltrials.gov/ct2/show/nct02092103>. Accessed Nov 30, 2019.
33. Effect of delayed cord clamping versus umbilical cord milking on cerebral blood flow in preterm infant: A randomized, double-blind controlled trial. CHICTR1800018366. <http://www.chictr.org.cn/showprojen.aspx?proj=30981>. Accessed Nov 30, 2019.
